# Supplementary material for: Comparison of the Effects of Brazil Nut Oil and Soybean Oil on the Cardiometabolic Parameters of Patients with Metabolic Syndrome: A Randomized Trial
Source: PubMed Central journal article supplement (PMC7019763; doi:10.3390/nu12010046), 2019-12-23
Supplement: nutrients-12-00046-s001.pdf [file nutrients-12-00046-s001.pdf]

**Table S1.** Study data.

| Group | Age in years | Gender | BMI T0 | BMI T1 | WC T0 | WC T1 | %BF T0 | %BF T1 | SBP T0 | DBP T0 | SBP T1 | DBP T1 | Glucose T0 | Glucose T1 | TEAC T0 | TEAC T1 | TBARS T0 | TBARS T1 | TC T0  | TC T1  | HDL T0 | HDL T1 | LDL T0 | LDL T1 | TG T0  | TG T1  |
|-------|--------------|--------|--------|--------|-------|-------|--------|--------|--------|--------|--------|--------|------------|------------|---------|---------|----------|----------|--------|--------|--------|--------|--------|--------|--------|--------|
| BNO   | 36           | M      | 39.27  | 38.97  | 118   | 118   | 39.9   | 39.2   | 156    | 108    | 154    | 105    | 274.8      | 294.8      | 3.440   | 2.270   | 3.796    | 2.176    | 179.15 | 175.56 | 42.91  | 33.04  | 94.34  | 35.09  | 209.48 | 537.16 |
| BNO   | 63           | F      | 34.68  | 33.74  | 115   | 111   | 49.6   | 50.7   | 95     | 68     | 95     | 66     | 238.0      | 242.7      | 3.374   | 3.521   | 2.870    | 4.028    | 252.65 | 315.04 | 27.97  | 30.38  | 169.36 | 225.71 | 276.56 | 294.76 |
| BNO   | 62           | M      | 30.00  | 29.93  | 106   | 107   | 28.7   | 28.5   | 123    | 80     | 126    | 81     | 104.2      | 105.5      | 3.625   | 3.536   | 2.639    | 2.407    | 188.21 | 294.53 | 36.71  | 28.35  | 120.47 | 206.23 | 155.11 | 299.75 |
| BNO   | 62           | F      | 23.39  | 23.07  | 93    | 92    | 36.5   | 37     | 130    | 85     | 128    | 85     | 83.7       | 126.3      | 3.421   | 3.647   | 4.954    | 2.870    | 194.87 | 250.60 | 48.10  | 25.95  | 106.22 | 179.41 | 202.74 | 226.18 |
| BNO   | 60           | F      | 32.69  | 32.69  | 111   | 111   | 44.9   | 47.9   | 139    | 70     | 131    | 69     | 93.6       | 123.9      | 3.321   | 3.486   | 2.176    | 2.176    | 209.57 | 273.50 | 26.20  | 25.95  | 133.64 | 188.35 | 248.63 | 296.01 |
| BNO   | 60           | M      | 30.71  | 31.28  | 99    | 99    | 30.5   | 30.9   | 141    | 96     | 141    | 85     | 65.1       | 78.7       | 3.190   | 3.464   | 5.185    | 2.407    | 374.19 | 253.50 | 32.03  | 24.56  | 300.62 | 171.24 | 207.73 | 288.53 |
| BNO   | 63           | F      | 40.16  | 39.64  | 130   | 125   | 51.3   | 51.2   | 119    | 66     | 144    | 70     | 169.5      | 157.3      | 3.443   | 3.472   | 3.333    | 1.713    | 218.12 | 227.35 | 38.48  | 25.19  | 132.31 | 155.78 | 236.66 | 231.92 |
| BNO   | 61           | F      | 33.24  | 31.96  | 116   | 110   | 44.3   | 43.2   | 137    | 79     | 133    | 82     | 216.6      | 136.3      | 3.432   | 1.068   | 2.407    | 3.333    | 245.98 | 254.53 | 43.92  | 31.52  | 159.07 | 162.81 | 214.96 | 301.00 |
| BNO   | 47           | M      | 33.09  | 29.96  | 118   | 114   | 23.9   | 22.5   | 179    | 87     | 147    | 87     | 52.9       | 100.5      | 3.412   | 3.474   | 2.639    | 2.176    | 177.95 | 139.66 | 30.00  | 28.73  | 104.51 | 48.43  | 217.21 | 312.47 |
| BNO   | 47           | F      | 31.32  | 30.79  | 104   | 107   | 39.9   | 41.8   | 118    | 78     | 120    | 84     | 81.2       | 91.0       | 3.478   | 3.570   | 2.870    | 2.870    | 323.93 | 250.60 | 38.35  | 32.78  | 241.54 | 164.90 | 220.20 | 264.59 |
| BNO   | 60           | F      | 26.62  | 27.07  | 94    | 96    | 37.4   | 36.4   | 110    | 71     | 114    | 67     | 278.4      | 177.3      | 3.381   | 3.467   | 3.333    | 0.324*   | 250.26 | 24291  | 41.27  | 43.80  | 157.62 | 135.22 | 256.86 | 319.45 |
| BNO   | 64           | F      | 30.61  | 26.88  | 101   | 102   | 37.8   | 39     | 132    | 73     | 130    | 72     | 150.4      | 148.8      | 3.368   | 3.417   | 2.639    | 1.250    | 189.91 | 146.84 | 19.49  | 14.68  | 124.64 | 71.31  | 228.93 | 304.24 |
| BNO   | 63           | F      | 31.84  | 32.34  | 109   | 105   | 49.3   | 49.2   | 139    | 81     | 155    | 80     | 214.4      | 244.8      | 3.445   | 3.602   | 4.491    | 36.898*  | 236.58 | 259.32 | 44.56  | 19.49  | 143.40 | 184.71 | 243.14 | 275.56 |
| BNO   | 63           | F      | 28.56  | 28.24  | 109   | 108   | 36.7   | 36.4   | 122    | 63     | 108    | 68     | 86.7       | 91.7       | 0.322*  | 3.574   | 2.407    | 2.639    | 325.13 | 206.15 | 33.16  | 34.43  | 235.85 | 121.55 | 280.55 | 250.87 |
| BNO   | 64           | F      | 36.12  | 35.76  | 120   | 118   | 47.3   | 50.5   | 143    | 77     | 136    | 77     | 192.2      | 244.3      | 3.375   | 3.424   | 2.407    | 1.481    | 280.17 | 310.60 | 44.30  | 46.46  | 195.62 | 218.86 | 201.25 | 226.43 |
| SO    | 60           | F      | 28.24  | 28.29  | 104   | 101   | 37.9   | 37.5   | 153    | 80     | 113    | 62     | 107.8      | 108.5      | 3.113   | 3.421   | 3.565    | 29.954*  | 197.09 | 228.89 | 45.70  | 38.61  | 112.35 | 147.24 | 195.26 | 215.21 |
| SO    | 62           | F      | 30.68  | 30.95  | 108   | 104   | 39.2   | 41     | 156    | 80     | 137    | 72     | 130.7      | 109.5      | 3.413   | 3.385   | 4.259    | 8.194    | 237.09 | 188.89 | 45.19  | 62.53  | 151.65 | 80.82  | 201.25 | 227.68 |
| SO    | 63           | F      | 24.75  | 24.12  | 90    | 90    | 37.4   | 40.2   | 149    | 80     | 124    | 66     | 68.1       | 122.7      | 3.443   | 3.579   | 2.870    | 1.250    | 280.17 | 281.03 | 35.44  | 43.04  | 200.19 | 195.94 | 222.69 | 210.22 |
| SO    | 64           | F      | 32.45  | 32.10  | 109   | 104   | 48.6   | 49.8   | 106    | 69     | 115    | 74     | 103.9      | 100.5      | 3.312   | 3.488   | 2.870    | 1.944    | 234.53 | 275.38 | 54.43  | 77.22  | 141.40 | 156.27 | 193.52 | 209.48 |
| SO    | 43           | F      | 35.64  | 35.45  | 105   | 100   | 47.8   | 48.6   | 119    | 81     | 105    | 67     | 205.5      | 98.3       | 3.394   | 3.571   | 2.407    | 4.259    | 251.11 | 218.80 | 28.99  | 35.32  | 174.99 | 133.36 | 235.66 | 250.62 |

|    |    |   |       |       |     |     |      |      |     |    |     |     |       |       |       |       |       |       |        |        |       |       |        |        |        |        |
|----|----|---|-------|-------|-----|-----|------|------|-----|----|-----|-----|-------|-------|-------|-------|-------|-------|--------|--------|-------|-------|--------|--------|--------|--------|
| SO | 56 | F | 30.18 | 30.09 | 109 | 109 | 43.5 | 46.6 | 134 | 71 | 122 | 67  | 96.1  | 84.1  | 3.214 | 3.535 | 2.639 | 1.250 | 187.69 | 265.64 | 47.34 | 48.86 | 98.70  | 181.37 | 208.23 | 177.06 |
| SO | 54 | F | 38.05 | 38.70 | 117 | 117 | 53.5 | 52.8 | 146 | 94 | 148 | 103 | 106.8 | 110.0 | 3.346 | 3.533 | 3.102 | 4.259 | 232.99 | 254.87 | 19.11 | 23.80 | 162.01 | 185.49 | 259.35 | 227.93 |
| SO | 63 | F | 28.18 | 27.91 | 102 | 96  | 42.4 | 42.9 | 154 | 80 | 125 | 75  | 111.6 | 94.1  | 3.438 | 3.477 | 2.407 | 1.250 | 217.09 | 280.34 | 64.05 | 45.95 | 115.94 | 194.79 | 185.54 | 198.00 |
| SO | 65 | F | 34.01 | 33.60 | 106 | 111 | 51.5 | 50.1 | 139 | 88 | 135 | 73  | 127.7 | 101.2 | 3.465 | 3.463 | 2.870 | 3.796 | 133.85 | 232.31 | 47.97 | 46.96 | 53.35  | 141.75 | 162.59 | 217.96 |
| SO | 51 | F | 25.16 | 25.26 | 87  | 90  | 40.1 | 41.4 | 148 | 88 | 134 | 81  | 126.6 | 101.9 | 3.523 | 3.595 | 3.333 | 1.713 | 254.53 | 310.43 | 40.00 | 32.15 | 152.73 | 208.95 | 308.98 | 346.63 |
| SO | 60 | F | 28.74 | 28.60 | 93  | 90  | 43.1 | 43.4 | 114 | 71 | 137 | 80  | 103.0 | 93.6  | 3.454 | 3.336 | 3.102 | 2.407 | 218.80 | 225.81 | 21.65 | 19.62 | 156.26 | 154.52 | 204.49 | 258.35 |
| SO | 56 | F | 39.86 | 39.61 | 122 | 118 | 52.8 | 52.4 | 148 | 78 | 137 | 87  | 113.6 | 82.0  | 3.457 | 3.595 | 2.176 | 5.185 | 192.14 | 192.48 | 39.11 | 41.65 | 104.49 | 119.71 | 242.64 | 155.61 |
| SO | 61 | F | 31.42 | 31.87 | 101 | 105 | 47.2 | 46.2 | 133 | 82 | 144 | 84  | 91.1  | 91.2  | 3.475 | 3.638 | 3.565 | 1.713 | 228.21 | 252.82 | 25.44 | 28.35 | 166.10 | 184.67 | 183.29 | 199.00 |
| SO | 62 | F | 25.32 | 24.93 | 80  | 84  | 41.4 | 43   | 113 | 72 | 99  | 63  | 85.0  | 79.9  | 3.459 | 3.263 | 3.333 | 2.639 | 177.26 | 172.31 | 38.35 | 50.38 | 99.41  | 90.61  | 197.51 | 156.61 |
| SO | 57 | F | 31.68 | 32.00 | 102 | 103 | 44.9 | 45.8 | 120 | 76 | 132 | 90  | 113.6 | 188.6 | 3.447 | 3.509 | 2.407 | 0.787 | 196.07 | 204.79 | 51.90 | 48.61 | 96.84  | 121.52 | 236.66 | 173.32 |
| SO | 56 | M | 29.06 | 28.87 | 102 | 99  | 28.1 | 26.9 | 114 | 76 | 110 | 79  | 162.0 | 142.2 | 3.432 | 3.620 | 3.796 | 4.028 | 226.32 | 263.59 | 39.75 | 36.33 | 135.41 | 187.76 | 255.86 | 197.51 |

BNO (Brazil nut oil), SO (Soybean oil), BMI (body mass index, %BF (percent body fat), WC (waist circumference), SBP (systolic blood pressure), DBP (diastolic blood pressure), TC (total cholesterol), LDL (Low-density lipoprotein), HDL (High-density lipoprotein), TG (triglycerides), MDA (malondialdehyde), TEAC (Trolox equivalent antioxidant capacity). \*Outliers.
